# Supplementary material for: Urothelial Cancer Associated 1 (UCA1) and miR-193 Are Two Non-coding RNAs Involved in Trophoblast Fusion and Placental Diseases
Source: Front Cell Dev Biol. 2021 May 13;9:633937. doi: 10.3389/fcell.2021.633937 (PMC8155540; doi:10.3389/fcell.2021.633937)
Supplement: Supplementary file 7 [file Table_4.xlsx]

## Sheet: Feuil1
Table S4: Oligonucleotides for qRT-PCR
UCA1.f	CCCCTTGGACCATCACAGAT
UCA1.r	GAGGAGAGATCAAGCTGGCT
UCA1 TM probe	CGGGTAACTCTTACGGTGGA	Modification 5' 6FAM	Modification 3' TAMRA
BAX.1	TGCTTCAGGGTTTCATCCAG
BAX.2	GGCGGCAATCATCCTCT
BCL2.1	AGGAAGTGAACATTTCGGTGAC
BCL2.2	GCTCAGTTCCAGGACCAGGC
DAPK1.1	CAGTGTTGTTGCTCTAGGAAG
DAPK1.2	GGGACTGCCACAAATGATGAGC
BAD.1	GAGTGAGCAGGAAGACTCCAGC
BAD.2	TCCACAAACTCGTCACTCATCC
KI67.2	GCACCAAGTTTTACTACATCTGCC
KI67.1	GAAAGAGTGGCAACCTGCCTTC
ANXA1.f	GCGGTGAGCCCCTATCCTA
ANXA1.r	TGATGGTTGCTTCATCCACAC
ANXA2.f	TCTACTGTTCACGAAATCCTGTG
ANXA2.r	AGTATAGGCTTTGACAGACCCAT
ITIH5.f	CCTACTGTAGTACAACAAGCCAG
ITIH5.r	TCCCCAATGCTCTGTTCTCTATT
TGM2.f	CGTGACCAACTACAACTCGG
TGM2.r	CATCCACGACTCCACCCAG
ERVW-1_(Syncytin1.f)	ATGGAGCCCAAGATGCAG
ERVW-1_(Syncytin1.r)	AGATCGTGGGCTAGCAG
ERVFRD-1_(Syncytin2.f)	CCTTCACTAGCAGCCTACCG
ERVFRD-1_(Syncytin2.r)	GCTGTCCCTGGTGTTTCAGT
CGA.f	TGCCCAGAATGCACGCTAC
CGA.r	TTGGACCTTAGTGGAGTGGGA
NOS3.f	TGATGGCGAAGCGAGTGAAG
NOS3.r	ACTCATCCATACACAGGACCC
CAV1.f	GCGACCCTAAACACCTCAAC
CAV1.r	ATGCCGTCAAAACTGTGTGTC
PPIB.f	ATGGCAAGCATGTGGTGTTT
PPIB.r	TATCCCGGCTGTCTGTCTTG
INHA.f	GAAACTGGGAGGGTACACGA
INHA.r	TGCCAACTGCCACAGAGTAG
MMP9.f	AGACCTGGGCAGATTCCAAAC
MMP9.r	CGGCAAGTCTTCCGAGTAGT
CGB1.f	CAGCAGCAGCCCCTTTGAC
CGB1.r	GGTCCGCTGACTCTGGC
